# Supplementary material for: Genome-wide differential expression profiling of mRNAs and lncRNAs associated with prolificacy in Hu sheep
Source: PubMed Central journal article supplement (PMC5920141; doi:10.1042/bsr20171350), 2018-04-27
Supplement: bsr20171350_Supp1.pdf [file bsr20171350_Supp1.pdf]

# Supplementary Materials:Genome-wide differential expression profiling of mRNAs and lncRNAs associated with prolificacy in Hu sheep

Xu Feng, Fengzhe Li, Feng Wang, Guomin Zhang, Jing Pang, Caifang Ren, Tingting Zhang,  
Hua Yang, Ziyu Wang, Yanli Zhang

**Table S1.** Details of primer sequences, expected product sizes and Genbank accession numbers of genes used for qRT-PCR

| Gene               | Primer sequence(5'- 3')                               | Product size(bp) | Accession number |
|--------------------|-------------------------------------------------------|------------------|------------------|
| CCL26              | F:GATGTGGCCAAGTTCTGCTG<br>R: TCGGCTGGGCACATACTTTC     | 148              | XM_004020976.3   |
| TSPAN32            | F:AAGAAGTGGGTGTGGGCTTT<br>R:CCTGGCCCAATTTGAAGGAC      | 144              | NM_001114667.1   |
| LOC101121<br>216   | F:GCCAACTACAAGGGTGCAGA<br>R: TTGTTAGGCAGGCCAGCAG      | 257              | XM_004019478.3   |
| TYROBP             | F:ATGCAACTGCTCCTCGTTGA<br>R:GTGATGTGCTGTTCCGGGT       | 159              | XM_012120538.1   |
| GPNMB              | F:CCTGGTATCCCCAGATGCC<br>R:GTCCACGCTGTCCAGTTGTA       | 120              | XM_004007790.3   |
| TCONS_00<br>025574 | F:TGTCCGCTGCTGCCACTTCTA<br>R: TAACGGGCTCCTGCTGGATGAG  | 132              | --               |
| TCONC_00<br>049541 | F:TGCTCAGAGGCTCAGTCGTGTT<br>R: CCTCCCAGGCAGTTCAGTGGTA | 194              | --               |
| TCONC_00<br>530192 | F:TGAAGCAGCAGAGGACACAGGT<br>R:AGGTTGCTCAGTGGTTCAGAGG  | 113              | --               |
| TCONS_00<br>560231 | F:TGTTGCTGAAGTGGCAGGAACC<br>R:TGTTGCTGAAGTGGCAGGAACC  | 232              | --               |
| TCONC_00<br>920308 | F:ACAAGGGAGGCTTGTTGGTG<br>R: CTGAGTCCACTGCTTGGTGA     | 107              | --               |
| BMPR1B             | F: GTGCCGTGAACGCACTAACA<br>R: AGACAAAACGTGCTCCTTCAA   | 559              | NW_011942424.1   |
| CTSB               | F: TAGGCTGGGGAGTGGAGAAC<br>R: AGTACTGATGAGTGCACGGC    | 159              | NM_001308587.1   |
| CTSD               | F: GCCAGGACCCTGTGTCG<br>R: GCACGTTGTTGACGGAGATG       | 174              | XM_012171958.2   |
| GAPDH              | F:GTCAAGGCAGAGAACGGGAA<br>R:GGTTCACGCCCATCACAAAC      | 232              | XM_012166462.1   |



**Table S3** Top20 Biological Process Terms of DE-mRNAs

| <b>GO.ID</b> | <b>Term</b>                                          | <b>Annota<br/>ted</b> | <b>Signific<br/>ant</b> | <b>Expect<br/>ed</b> | <b>KS</b> |
|--------------|------------------------------------------------------|-----------------------|-------------------------|----------------------|-----------|
| GO:0009887   | organ morphogenesis                                  | 2508                  | 5                       | 9.22                 | 3.10E-07  |
| GO:0044763   | single-organism cellular process                     | 12940                 | 51                      | 47.59                | 1.40E-06  |
| GO:0001501   | skeletal system development                          | 1683                  | 6                       | 6.19                 | 3.20E-06  |
| GO:0042742   | defense response to bacterium                        | 169                   | 7                       | 0.62                 | 3.70E-06  |
| GO:0050896   | response to stimulus                                 | 9907                  | 50                      | 36.43                | 1.70E-05  |
| GO:0045654   | positive regulation of megakaryocyte differentiation | 79                    | 2                       | 0.29                 | 1.90E-05  |
| GO:1901989   | positive regulation of cell cycle phase transition   | 84                    | 1                       | 0.31                 | 2.30E-05  |
| GO:0006958   | complement activation, classical pathway             | 28                    | 2                       | 0.1                  | 2.70E-05  |
| GO:0009888   | tissue development                                   | 3162                  | 9                       | 11.63                | 4.50E-05  |
| GO:0044765   | single-organism transport                            | 3913                  | 26                      | 14.39                | 0.00011   |
| GO:0001818   | negative regulation of cytokine production           | 152                   | 6                       | 0.56                 | 0.00026   |
| GO:0002376   | immune system process                                | 2537                  | 28                      | 9.33                 | 0.00031   |
| GO:0006950   | response to stress                                   | 3422                  | 29                      | 12.58                | 0.00038   |
| GO:0008206   | bile acid metabolic process                          | 49                    | 1                       | 0.18                 | 0.00043   |
| GO:0048513   | organ development                                    | 5586                  | 20                      | 20.54                | 0.00055   |
| GO:0019882   | antigen processing and presentation                  | 106                   | 4                       | 0.39                 | 0.00066   |
| GO:0035095   | behavioral response to nicotine                      | 11                    | 1                       | 0.04                 | 0.0008    |
| GO:0071384   | cellular response to corticosteroid stimulus         | 28                    | 1                       | 0.1                  | 0.00084   |
| GO:0050718   | positive regulation of interleukin-1 beta secretion  | 18                    | 1                       | 0.07                 | 0.00087   |
| GO:0016488   | farnesol catabolic process                           | 19                    | 1                       | 0.07                 | 0.00098   |
| GO:1900053   | negative regulation of retinoic acid                 | 19                    | 1                       | 0.07                 | 0.0009    |

|            |                                                           |     |   |      |        |
|------------|-----------------------------------------------------------|-----|---|------|--------|
|            | biosynthetic process                                      |     |   |      | 8      |
| GO:2000224 | regulation of testosterone biosynthetic process           | 19  | 1 | 0.07 | 0.0009 |
|            |                                                           |     |   |      | 8      |
| GO:0022604 | regulation of cell morphogenesis                          | 449 | 1 | 1.65 | 0.0010 |
|            |                                                           |     |   |      | 6      |
| GO:0042448 | progesterone metabolic process                            | 27  | 1 | 0.1  | 0.0012 |
| GO:2000353 | positive regulation of endothelial cell apoptotic process | 27  | 1 | 0.1  | 0.0012 |

Annotated: all genes annotated to the function of the number of genes; Significant: different expression gene annotated to the function of the number of genes; Expected: to the function of the number of different expression gene expectations; KS: p value of KS test , the smaller the KS value, indicating its enrichment is more significant.

**Table S4** Top20 Cellular Component Terms of DE-mRNAs

| GO.ID | Term | Annot | Signifi | Expe | KS |
|-------|------|-------|---------|------|----|
|-------|------|-------|---------|------|----|

|            |                                     | <b>ated</b> | <b>cant</b> | <b>cted</b> |          |
|------------|-------------------------------------|-------------|-------------|-------------|----------|
| GO:0044446 | intracellular organelle part        | 7407        | 16          | 27.6        | 2.70E-05 |
| GO:0005765 | lysosomal membrane                  | 98          | 2           | 0.37        | 8.60E-05 |
| GO:0005789 | endoplasmic reticulum membrane      | 601         | 1           | 2.24        | 0.00017  |
| GO:0005576 | extracellular region                | 3294        | 21          | 12.27       | 0.00042  |
| GO:0005892 | acetylcholine-gated channel complex | 15          | 1           | 0.06        | 0.00043  |
| GO:0005634 | nucleus                             | 6087        | 12          | 22.68       | 0.00238  |
| GO:0005938 | cell cortex                         | 296         | 2           | 1.1         | 0.00252  |
| GO:0044428 | nuclear part                        | 2871        | 5           | 10.7        | 0.00285  |
| GO:0043234 | protein complex                     | 4474        | 15          | 16.67       | 0.00347  |
| GO:0030670 | phagocytic vesicle membrane         | 32          | 1           | 0.12        | 0.00644  |
| GO:0097458 | neuron part                         | 985         | 3           | 3.67        | 0.00912  |
| GO:0043005 | neuron projection                   | 663         | 2           | 2.47        | 0.01114  |
| GO:0005829 | cytosol                             | 1316        | 7           | 4.9         | 0.01891  |
| GO:0032991 | macromolecular complex              | 5672        | 16          | 21.14       | 0.0196   |
| GO:0012505 | endomembrane system                 | 2949        | 12          | 10.99       | 0.02332  |
| GO:0034364 | high-density lipoprotein particle   | 23          | 1           | 0.09        | 0.02334  |
| GO:0044430 | cytoskeletal part                   | 1938        | 2           | 7.22        | 0.02398  |
| GO:0043233 | organelle lumen                     | 2404        | 5           | 8.96        | 0.02521  |
| GO:0070013 | intracellular organelle lumen       | 2400        | 5           | 8.94        | 0.02752  |
| GO:0031974 | membrane-enclosed lumen             | 2468        | 5           | 9.2         | 0.03234  |

**Table S5** Top20 Molecular Function Terms of DE-mRNAs

| <b>GO.ID</b> | <b>Term</b>                                              | <b>Annot<br/>ated</b> | <b>Signifi<br/>cant</b> | <b>Expec<br/>ted</b> | <b>KS</b> |
|--------------|----------------------------------------------------------|-----------------------|-------------------------|----------------------|-----------|
| GO:0005044   | scavenger receptor activity                              | 68                    | 2                       | 0.26                 | 2.60E-07  |
| GO:0015464   | acetylcholine receptor activity                          | 17                    | 1                       | 0.06                 | 0.00028   |
| GO:0004032   | alditol:NADP+ 1-oxidoreductase activity                  | 26                    | 1                       | 0.1                  | 0.00032   |
| GO:0047115   | trans-1,2-dihydrobenzene-1,2-diol dehydrogenase activity | 20                    | 1                       | 0.08                 | 0.00058   |
| GO:0005506   | iron ion binding                                         | 212                   | 5                       | 0.81                 | 0.00077   |
| GO:0045703   | ketoreductase activity                                   | 19                    | 1                       | 0.07                 | 0.00084   |
| GO:0047086   | ketosteroid monooxygenase activity                       | 19                    | 1                       | 0.07                 | 0.00084   |

|            |                                                                    |      |    |       |         |
|------------|--------------------------------------------------------------------|------|----|-------|---------|
| GO:0047020 | 15-hydroxyprostaglandin-D dehydrogenase (NADP+) activity           | 19   | 1  | 0.07  | 0.00084 |
| GO:0047042 | androsterone dehydrogenase (B-specific) activity                   | 19   | 1  | 0.07  | 0.00084 |
| GO:0047035 | testosterone dehydrogenase (NAD+) activity                         | 19   | 1  | 0.07  | 0.00084 |
| GO:0047006 | 17-alpha,20-alpha-dihydroxypregn-4-en-3-one dehydrogenase activity | 19   | 1  | 0.07  | 0.00084 |
| GO:0045550 | geranylgeranyl reductase activity                                  | 19   | 1  | 0.07  | 0.00084 |
| GO:0047787 | delta4-3-oxosteroid 5beta-reductase activity                       | 19   | 1  | 0.07  | 0.00084 |
| GO:0035410 | dihydrotestosterone 17-beta-dehydrogenase activity                 | 19   | 1  | 0.07  | 0.00084 |
| GO:0018636 | phenanthrene 9,10-monooxygenase activity                           | 19   | 1  | 0.07  | 0.00084 |
| GO:0047017 | prostaglandin-F synthase activity                                  | 17   | 1  | 0.06  | 0.00177 |
| GO:0036131 | prostaglandin D2 11-ketoreductase activity                         | 17   | 1  | 0.06  | 0.00177 |
| GO:0004252 | serine-type endopeptidase activity                                 | 158  | 1  | 0.6   | 0.00208 |
| GO:0016787 | hydrolase activity                                                 | 2745 | 20 | 10.44 | 0.0024  |

**Table S6** Top20 Cellular Component Terms of the target genes of DE-lncRNAs

| GO.ID      | Term                                 | Annot<br>ated | Signifi<br>cant | Expe<br>cted | KS       |
|------------|--------------------------------------|---------------|-----------------|--------------|----------|
| GO:0050896 | response to stimulus                 | 9907          | 5               | 4.48         | 6.50E-07 |
| GO:0044763 | single-organism cellular process     | 12940         | 6               | 5.86         | 1.50E-06 |
| GO:0009888 | tissue development                   | 3162          | 1               | 1.43         | 4.40E-05 |
| GO:0044765 | single-organism transport            | 3913          | 1               | 1.77         | 9.70E-05 |
| GO:0006950 | response to stress                   | 3422          | 2               | 1.55         | 0.00033  |
| GO:0048513 | organ development                    | 5586          | 2               | 2.53         | 0.00039  |
| GO:0044711 | single-organism biosynthetic process | 1265          | 1               | 0.57         | 0.00124  |

|            |                                                                         |      |   |      |         |
|------------|-------------------------------------------------------------------------|------|---|------|---------|
| GO:0051716 | cellular response to stimulus                                           | 7400 | 3 | 3.35 | 0.00154 |
| GO:0006508 | proteolysis                                                             | 1261 | 2 | 0.57 | 0.00176 |
| GO:0016043 | cellular component organization                                         | 6252 | 3 | 2.83 | 0.00196 |
| GO:0006810 | transport                                                               | 4832 | 1 | 2.19 | 0.00209 |
| GO:0006957 | complement activation, alternative pathway                              | 16   | 1 | 0.01 | 0.00239 |
| GO:0065008 | regulation of biological quality                                        | 3641 | 3 | 1.65 | 0.00301 |
| GO:0043170 | macromolecule metabolic process                                         | 9613 | 6 | 4.35 | 0.00375 |
| GO:0045934 | negative regulation of nucleobase-containing compound metabolic process | 1119 | 2 | 0.51 | 0.00388 |
| GO:0006464 | cellular protein modification process                                   | 3089 | 1 | 1.4  | 0.00474 |
| GO:0006996 | organelle organization                                                  | 3561 | 2 | 1.61 | 0.0053  |
| GO:0019538 | protein metabolic process                                               | 5283 | 4 | 2.39 | 0.00546 |
| GO:0002376 | immune system process                                                   | 2537 | 1 | 1.15 | 0.00862 |
| GO:0030154 | cell differentiation                                                    | 4631 | 2 | 2.1  | 0.011   |
| GO:0010466 | negative regulation of peptidase activity                               | 174  | 1 | 0.08 | 0.01208 |
| GO:0048869 | cellular developmental process                                          | 5001 | 2 | 2.26 | 0.01277 |

---

Significant: target gene of DE-lncRNAs that annotated to the function of the number of genes

**Table S7** Top20 Biological Process Terms of the target genes of DE-lncRNAs

| <b>GO.ID</b> | <b>Term</b>                  | <b>Annotat<br/>ed</b> | <b>Significa<br/>nt</b> | <b>Expect<br/>ed</b> | <b>KS</b>    |
|--------------|------------------------------|-----------------------|-------------------------|----------------------|--------------|
| GO:0044446   | intracellular organelle part | 7407                  | 6                       | 3.3                  | 2.20E-<br>05 |
| GO:0005765   | lysosomal membrane           | 98                    | 1                       | 0.04                 | 0.0001<br>6  |
| GO:0005576   | extracellular region         | 3294                  | 2                       | 1.47                 | 0.0007<br>9  |
| GO:0005634   | nucleus                      | 6087                  | 5                       | 2.71                 | 0.0021<br>8  |
| GO:0044428   | nuclear part                 | 2871                  | 4                       | 1.28                 | 0.0030<br>4  |
| GO:0043234   | protein complex              | 4474                  | 4                       | 1.99                 | 0.0034<br>8  |
| GO:0032991   | macromolecular complex       | 5672                  | 5                       | 2.52                 | 0.0173       |



|            |                                                |      |   |      |             |
|------------|------------------------------------------------|------|---|------|-------------|
| GO:0005829 | cytosol                                        | 1316 | 1 | 0.59 | 0.0189<br>8 |
| GO:0012505 | endomembrane system                            | 2949 | 2 | 1.31 | 0.0218<br>4 |
| GO:0044430 | cytoskeletal part                              | 1938 | 1 | 0.86 | 0.0223<br>3 |
| GO:0043233 | organelle lumen                                | 2404 | 3 | 1.07 | 0.0279<br>1 |
| GO:0070013 | intracellular organelle lumen                  | 2400 | 3 | 1.07 | 0.0304<br>4 |
| GO:0031300 | intrinsic component of organelle<br>membran... | 167  | 0 | 0.07 | 0.0308<br>9 |
| GO:0044422 | organelle part                                 | 7655 | 6 | 3.41 | 0.0324<br>6 |
| GO:0031974 | membrane-enclosed lumen                        | 2468 | 3 | 1.1  | 0.0354<br>1 |
| GO:0036128 | CatSper complex                                | 14   | 1 | 0.01 | 0.0374<br>2 |
| GO:0031981 | nuclear lumen                                  | 2071 | 2 | 0.92 | 0.0374<br>3 |
| GO:0015630 | microtubule cytoskeleton                       | 1336 | 1 | 0.59 | 0.0463<br>1 |
| GO:0005694 | chromosome                                     | 909  | 1 | 0.4  | 0.0474<br>9 |
| GO:0034707 | chloride channel complex                       | 41   | 1 | 0.02 | 0.0531<br>2 |

**Table S8** The pathway enrich in DE-mRNAs

| #Kegg_pathway                   | ko_id   | Cluter_frequency                  | P-value  | Corrected_P-value |
|---------------------------------|---------|-----------------------------------|----------|-------------------|
| Lysosome                        | ko04142 | 14 out of 47<br>29.7872340425532% | 4.24E-14 | 1.40E-12          |
| Tuberculosis                    | ko05152 | 8 out of 47<br>17.0212765957447%  | 2.59E-05 | 0.000854          |
| Mineral absorption              | ko04978 | 5 out of 47<br>10.6382978723404%  | 3.46E-05 | 0.001141          |
| Staphylococcus aureus infection | ko05150 | 5 out of 47<br>10.6382978723404%  | 0.00011  | 0.003615          |
| Pertussis                       | ko05133 | 5 out of 47<br>10.6382978723404%  | 0.00016  | 0.003835          |
| Phagosome                       | ko04145 | 7 out of 47<br>14.8936170212766%  | 0.000178 | 0.005882          |
| Osteoclast differentiation      | ko04380 | 5 out of 47                       | 0.0007   | 0.025813          |

|                                           |         |                                  |              |          |
|-------------------------------------------|---------|----------------------------------|--------------|----------|
|                                           |         | 10.6382978723404%                | 82           |          |
| Complement and coagulation cascades       | ko04610 | 3 out of 47<br>6.38297872340426% | 0.0113<br>77 | 0.375438 |
| Leishmaniasis                             | ko05140 | 3 out of 47<br>6.38297872340426% | 0.0130<br>24 | 0.429805 |
| Legionellosis                             | ko05134 | 3 out of 47<br>6.38297872340426% | 0.0143<br>45 | 0.473391 |
| Hematopoietic cell lineage                | ko04640 | 3 out of 47<br>6.38297872340426% | 0.0177<br>14 | 0.584572 |
| Prion diseases                            | ko05020 | 2 out of 47<br>4.25531914893617% | 0.0186<br>36 | 0.614976 |
| Fc gamma R-mediated phagocytosis          | ko04666 | 3 out of 47<br>6.38297872340426% | 0.0192<br>82 | 0.636317 |
| Antigen processing and presentation       | ko04612 | 3 out of 47<br>6.38297872340426% | 0.0244<br>36 | 0.8064   |
| Nicotine addiction                        | ko05033 | 2 out of 47<br>4.25531914893617% | 0.0286<br>33 | 0.944905 |
| Natural killer cell mediated cytotoxicity | ko04650 | 3 out of 47<br>6.38297872340426% | 0.0309<br>56 | 1        |
| Systemic lupus erythematosus              | ko05322 | 3 out of 47<br>6.38297872340426% | 0.0517<br>47 | 1        |
| Malaria                                   | ko05144 | 2 out of 47<br>4.25531914893617% | 0.0550<br>21 | 1        |
| PPAR signaling pathway                    | ko03320 | 2 out of 47<br>4.25531914893617% | 0.0662<br>72 | 1        |
| Rheumatoid arthritis                      | ko05323 | 2 out of 47<br>4.25531914893617% | 0.1438<br>66 | 1        |
| Rap1 signaling pathway                    | ko04015 | 3 out of 47<br>6.38297872340426% | 0.1460<br>46 | 1        |
| Regulation of actin cytoskeleton          | ko04810 | 3 out of 47<br>6.38297872340426% | 0.1517<br>28 | 1        |
| Protein digestion and absorption          | ko04974 | 2 out of 47<br>4.25531914893617% | 0.1627<br>86 | 1        |
| Sphingolipid signaling pathway            | ko04071 | 2 out of 47<br>4.25531914893617% | 0.1670<br>53 | 1        |
| Leukocyte transendothelial migration      | ko04670 | 2 out of 47<br>4.25531914893617% | 0.1691<br>93 | 1        |
| Chagas disease (American trypanosomiasis) | ko05142 | 2 out of 47<br>4.25531914893617% | 0.1691<br>93 | 1        |
| Amoebiasis                                | ko05146 | 2 out of 47<br>4.25531914893617% | 0.1734<br>9  | 1        |
| Neuroactive ligand-receptor interaction   | ko04080 | 3 out of 47<br>6.38297872340426% | 0.2505<br>28 | 1        |
| Influenza A                               | ko05164 | 2 out of 47                      | 0.2979       | 1        |

|                                         |         |                   |        |   |
|-----------------------------------------|---------|-------------------|--------|---|
|                                         |         | 4.25531914893617% | 94     |   |
| Transcriptional misregulation in cancer | ko05202 | 2 out of 47       | 0.3114 | 1 |
|                                         |         | 4.25531914893617% | 32     |   |
| Cell adhesion molecules (CAMs)          | ko04514 | 2 out of 47       | 0.3270 | 1 |
|                                         |         | 4.25531914893617% | 52     |   |
| Viral carcinogenesis                    | ko05203 | 2 out of 47       | 0.4183 | 1 |
|                                         |         | 4.25531914893617% | 88     |   |
| PI3K-Akt signaling pathway              | ko04151 | 2 out of 47       | 0.6561 | 1 |
|                                         |         | 4.25531914893617% | 37     |   |

**Table S9** The pathway enrich in DE-lncRNAs

| #Kegg_pathway                       | ko_id   | Cluter_frequency                | P-value      | Corrected_P-value |
|-------------------------------------|---------|---------------------------------|--------------|-------------------|
| Spliceosome                         | ko03040 | 2 out of 6<br>33.3333333333333% | 0.0072<br>33 | 0.13743           |
| Other glycan degradation            | ko00511 | 1 out of 6<br>16.6666666666667% | 0.0205<br>97 | 0.391341          |
| Aminoacyl-tRNA biosynthesis         | ko00970 | 1 out of 6<br>16.6666666666667% | 0.0363<br>71 | 0.691052          |
| Sphingolipid metabolism             | ko00600 | 1 out of 6<br>16.6666666666667% | 0.0371<br>17 | 0.705223          |
| Lysine degradation                  | ko00310 | 1 out of 6<br>16.6666666666667% | 0.0511<br>97 | 0.972741          |
| Complement and coagulation cascades | ko04610 | 1 out of 6<br>16.6666666666667% | 0.0585<br>38 | 1                 |
| Staphylococcus aureus infection     | ko05150 | 1 out of 6<br>16.6666666666667% | 0.0600<br>01 | 1                 |

|                                             |         |                                 |              |   |
|---------------------------------------------|---------|---------------------------------|--------------|---|
| RNA degradation                             | ko03018 | 1 out of 6<br>16.6666666666667% | 0.0600<br>01 | 1 |
| Legionellosis                               | ko05134 | 1 out of 6<br>16.6666666666667% | 0.0636<br>49 | 1 |
| Estrogen signaling pathway                  | ko04915 | 1 out of 6<br>16.6666666666667% | 0.0759<br>64 | 1 |
| Antigen processing and presentation         | ko04612 | 1 out of 6<br>16.6666666666667% | 0.0774<br>04 | 1 |
| Lysosome                                    | ko04142 | 1 out of 6<br>16.6666666666667% | 0.0952<br>47 | 1 |
| Toxoplasmosis                               | ko05145 | 1 out of 6<br>16.6666666666667% | 0.1008<br>95 | 1 |
| Measles                                     | ko05162 | 1 out of 6<br>16.6666666666667% | 0.1030<br>06 | 1 |
| Influenza A                                 | ko05164 | 1 out of 6<br>16.6666666666667% | 0.1314<br>39 | 1 |
| Protein processing in endoplasmic reticulum | ko04141 | 1 out of 6<br>16.6666666666667% | 0.1362<br>17 | 1 |
| Epstein-Barr virus infection                | ko05169 | 1 out of 6<br>16.6666666666667% | 0.1564<br>5  | 1 |
| Endocytosis                                 | ko04144 | 1 out of 6<br>16.6666666666667% | 0.1683<br>98 | 1 |
| MAPK signaling pathway                      | ko04010 | 1 out of 6<br>16.6666666666667% | 0.1867<br>04 | 1 |
